# Supplementary material
Source: Springer Nature journal article supplement (https://www.springermedizin.de/resource/supplementary/12882_2003_17_MOESM3_ESM.pdf/9454794)

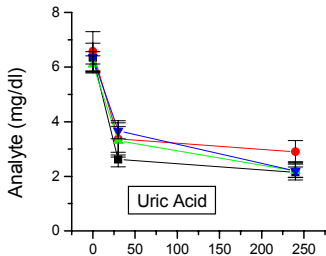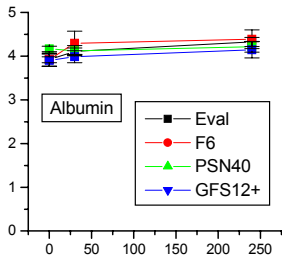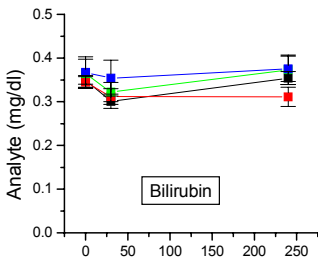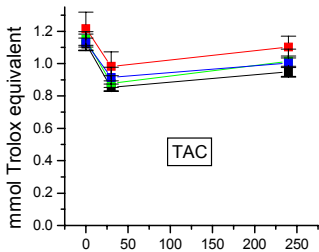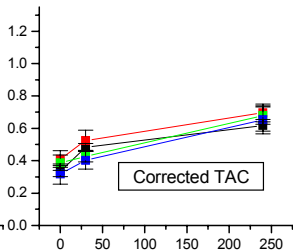

Time (min)

Supplement: MOESM3 [file 9454794]
